# Supplementary material
Source: publisher figshare collection journal article supplement (https://acs.figshare.com/ndownloader/files/3862726)

## Supporting Information

**Figure S1A and B.** Typical MRM chromatograms of standard vitamin E homologues (A) and a rice bran extract (B).

Standard vitamin E ( $\alpha$ -,  $\beta$ -,  $\gamma$ -,  $\delta$ -Tocs and -Toc-3s) and a rice bran extract (Nipponbare (extract 1)) were analyzed by HPLC-MS/MS with MRM. Detailed analytical conditions are described in the MATERIALS AND METHODS section.

**(A)**

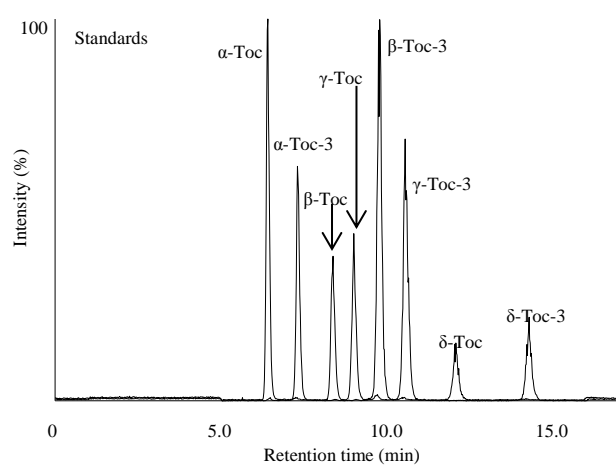

**(B)**

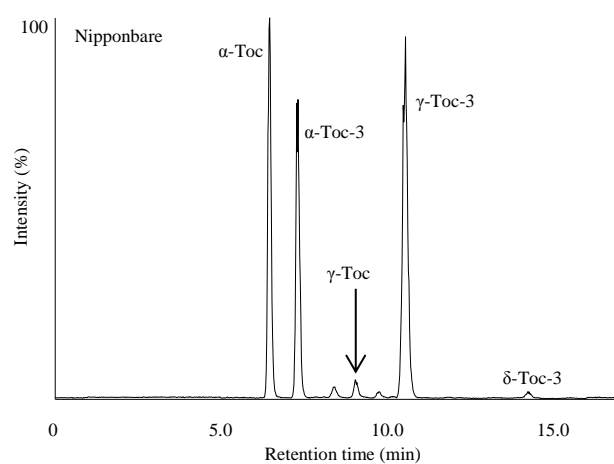

Supplement: Supplementary file 1 [file 3862726]
